# Supplementary material for: Clinically important alterations in pharmacogene expression in histologically severe nonalcoholic fatty liver disease
Source: PubMed Central journal article supplement (PMC10020163; doi:10.1038/s41467-023-37209-1), 2023-03-17
Supplement: 41467_2023_37209_MOESM1_ESM.pdf [file 41467_2023_37209_MOESM1_ESM.pdf]

**SUPPLEMENTARY FIGURE**

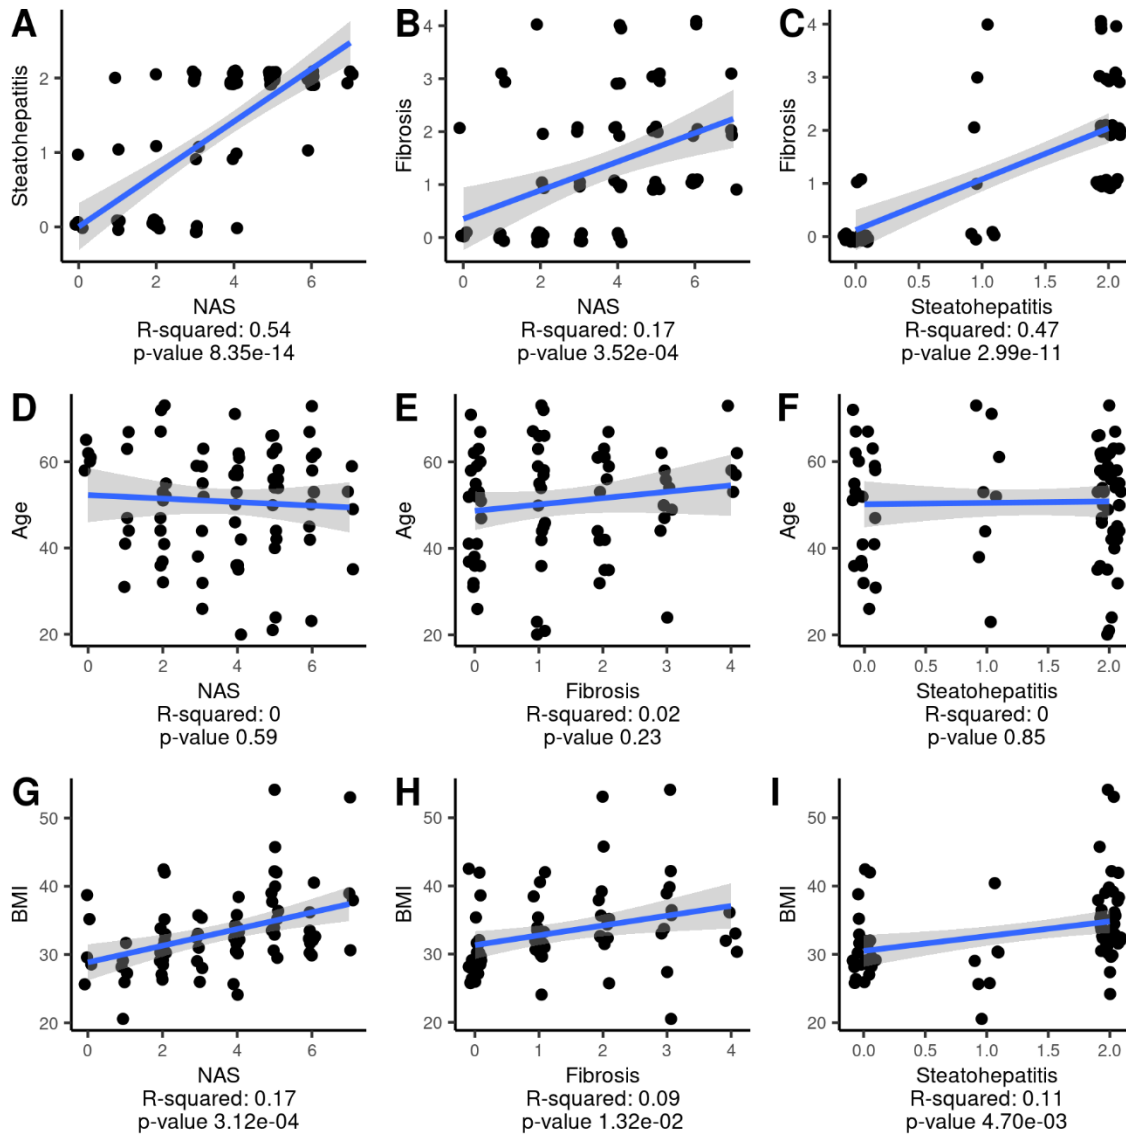

**SUPPLEMENTARY Figure 1:** Correlation between the 3 types of liver disease (A-C), and regressions between disease phenotypes and age (D-F) and BMI (G-I). Linear trendlines were fit (blue line) with 95% confidence interval region (grey). P-values shown are uncorrected.
