# Supplementary material for: Clinically important alterations in pharmacogene expression in histologically severe nonalcoholic fatty liver disease
Source: PubMed Central journal article supplement (PMC10020163; doi:10.1038/s41467-023-37209-1), 2023-03-17
Supplement: 41467_2023_37209_MOESM4_ESM.pdf [file 41467_2023_37209_MOESM4_ESM.pdf]

## Reporting Summary

Nature Portfolio wishes to improve the reproducibility of the work that we publish. This form provides structure for consistency and transparency in reporting. For further information on Nature Portfolio policies, see our [Editorial Policies](#) and the [Editorial Policy Checklist](#).

### Statistics

For all statistical analyses, confirm that the following items are present in the figure legend, table legend, main text, or Methods section.

- | n/a                                 | Confirmed                                                                                                                                                                                                                                                                                      |
|-------------------------------------|------------------------------------------------------------------------------------------------------------------------------------------------------------------------------------------------------------------------------------------------------------------------------------------------|
| <input type="checkbox"/>            | <input checked="" type="checkbox"/> The exact sample size ( $n$ ) for each experimental group/condition, given as a discrete number and unit of measurement                                                                                                                                    |
| <input type="checkbox"/>            | <input checked="" type="checkbox"/> A statement on whether measurements were taken from distinct samples or whether the same sample was measured repeatedly                                                                                                                                    |
| <input type="checkbox"/>            | <input checked="" type="checkbox"/> The statistical test(s) used AND whether they are one- or two-sided<br><i>Only common tests should be described solely by name; describe more complex techniques in the Methods section.</i>                                                               |
| <input type="checkbox"/>            | <input checked="" type="checkbox"/> A description of all covariates tested                                                                                                                                                                                                                     |
| <input type="checkbox"/>            | <input checked="" type="checkbox"/> A description of any assumptions or corrections, such as tests of normality and adjustment for multiple comparisons                                                                                                                                        |
| <input type="checkbox"/>            | <input checked="" type="checkbox"/> A full description of the statistical parameters including central tendency (e.g. means) or other basic estimates (e.g. regression coefficient) AND variation (e.g. standard deviation) or associated estimates of uncertainty (e.g. confidence intervals) |
| <input type="checkbox"/>            | <input checked="" type="checkbox"/> For null hypothesis testing, the test statistic (e.g. $F$ , $t$ , $r$ ) with confidence intervals, effect sizes, degrees of freedom and $P$ value noted<br><i>Give <math>P</math> values as exact values whenever suitable.</i>                            |
| <input checked="" type="checkbox"/> | <input type="checkbox"/> For Bayesian analysis, information on the choice of priors and Markov chain Monte Carlo settings                                                                                                                                                                      |
| <input checked="" type="checkbox"/> | <input type="checkbox"/> For hierarchical and complex designs, identification of the appropriate level for tests and full reporting of outcomes                                                                                                                                                |
| <input type="checkbox"/>            | <input checked="" type="checkbox"/> Estimates of effect sizes (e.g. Cohen's $d$ , Pearson's $r$ ), indicating how they were calculated                                                                                                                                                         |

*Our web collection on [statistics for biologists](#) contains articles on many of the points above.*

### Software and code

Policy information about [availability of computer code](#)

Data collection

All code used for this manuscript can be found at github ([https://github.com/Nickpowe/CYP2C19\\_NAFLD\\_code.git](https://github.com/Nickpowe/CYP2C19_NAFLD_code.git)). We permit the re-purposing of this code.

We used R (version 3.6.0, 4.0.2, and 4.0.4). Datasets available as "GEO2R" sets were analyzed in the online GEO portal for Log2 fold-change using the default settings, (Version info: R 3.2.3, Biobase 2.30.0, GEOquery 2.40.0, limma 3.26.8). Oligo version 1.62.1 and metagen version 4.9 were also used.

Data analysis

We used R (version 3.6.0, 4.0.2, and 4.0.4) for all analyses.

For manuscripts utilizing custom algorithms or software that are central to the research but not yet described in published literature, software must be made available to editors and reviewers. We strongly encourage code deposition in a community repository (e.g. GitHub). See the Nature Portfolio [guidelines for submitting code & software](#) for further information.

## Data

Policy information about [availability of data](#)

All manuscripts must include a [data availability statement](#). This statement should provide the following information, where applicable:

- Accession codes, unique identifiers, or web links for publicly available datasets
- A description of any restrictions on data availability
- For clinical datasets or third party data, please ensure that the statement adheres to our [policy](#)

Source data are provided with this paper. The source data contains logTPM pharmacogene RNA-seq values as described in the methods along with the NAFLD histological disease grades/stages/scores. Full RNA-seq gene count data is available under GEO accession number GSE225740 (<https://www.ncbi.nlm.nih.gov/geo/query/acc.cgi?acc=GSE225740>). Gene expression data used in the meta-analysis can be found at the data sources provided in Supplementary Data 20 and 22.

## Human research participants

Policy information about [studies involving human research participants and Sex and Gender in Research](#).

Reporting on sex and gender

Findings do not apply to only one sex. Sex was determined from patient's electronic medical records. Gender was not considered.

Population characteristics

Table 1 provides a detailed breakdown of the clinical and demographic data.

Recruitment

This study was undertaken on liver samples obtained from 93 patients with well characterized NAFLD who underwent percutaneous liver biopsies for their clinical care. We accept that our cohort poses a risk of selection bias. However, our observations are consistent in the meta-analyses with other studies. Therefore, we do not believe any potential selection bias diminishes the validity of our observations.

Ethics oversight

Indiana University Institutional Review Board (protocol numbers: 1506218127, 1011003025R008)

Note that full information on the approval of the study protocol must also be provided in the manuscript.

## Field-specific reporting

Please select the one below that is the best fit for your research. If you are not sure, read the appropriate sections before making your selection.

- Life sciences  Behavioural & social sciences  Ecological, evolutionary & environmental sciences

For a reference copy of the document with all sections, see [nature.com/documents/nr-reporting-summary-flat.pdf](https://www.nature.com/documents/nr-reporting-summary-flat.pdf)

## Life sciences study design

All studies must disclose on these points even when the disclosure is negative.

Sample size

sample size was based on patient availability and was not statistically determined.

Data exclusions

RNA samples with Agilent Bioanalyzer RIN > 6.0 were advanced for RNA library generation. Only samples with corresponding phenotype information were analyzed.

Replication

findings were reliably validated in 15 other studies. This is presented as a meta-analysis in the manuscript.

Randomization

Samples for RNA-seq were balanced across pools based on distribution of fibrosis stage, NAS score, date of biopsy, age, BMI, date of RNA isolation, RNA quality indicator (RQI), and RNA yield. Clinical groupings were made based on clinical information available and were not randomized.

Blinding

Blinding was not done because these samples were collected over the course of many years of clinical practice by the corresponding author.

## Reporting for specific materials, systems and methods

We require information from authors about some types of materials, experimental systems and methods used in many studies. Here, indicate whether each material, system or method listed is relevant to your study. If you are not sure if a list item applies to your research, read the appropriate section before selecting a response.

## Materials & experimental systems

| n/a                                 | Involvement in the study                               |
|-------------------------------------|--------------------------------------------------------|
| <input checked="" type="checkbox"/> | <input type="checkbox"/> Antibodies                    |
| <input checked="" type="checkbox"/> | <input type="checkbox"/> Eukaryotic cell lines         |
| <input checked="" type="checkbox"/> | <input type="checkbox"/> Palaeontology and archaeology |
| <input checked="" type="checkbox"/> | <input type="checkbox"/> Animals and other organisms   |
| <input checked="" type="checkbox"/> | <input type="checkbox"/> Clinical data                 |
| <input checked="" type="checkbox"/> | <input type="checkbox"/> Dual use research of concern  |

## Methods

| n/a                                 | Involvement in the study                        |
|-------------------------------------|-------------------------------------------------|
| <input checked="" type="checkbox"/> | <input type="checkbox"/> ChIP-seq               |
| <input checked="" type="checkbox"/> | <input type="checkbox"/> Flow cytometry         |
| <input checked="" type="checkbox"/> | <input type="checkbox"/> MRI-based neuroimaging |
